# Supplementary material
Source: Springer Nature journal article supplement (https://www.springermedizin.de/resource/supplementary/12936_2011_1913_MOESM2_ESM.pdf/9542054)
Supplement: MOESM2 [file 9542054]

A. Benin  
N=416

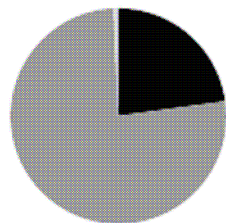

Chloroquine, 51%

B. DRC  
N=1,229

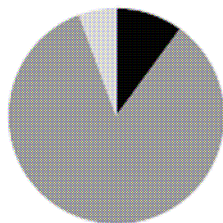

Quinine, 61%

C. Madagascar  
N=995

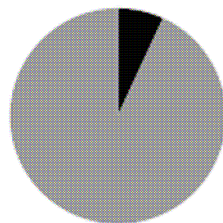

Chloroquine, 71%

D. Nigeria  
N=1,219

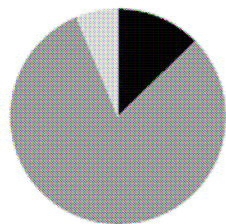

Chloroquine, 68%

E. Uganda  
N=1,015

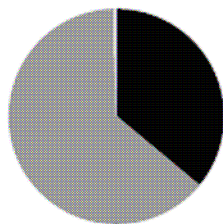

Quinine, 28%

F. Zambia  
N=772

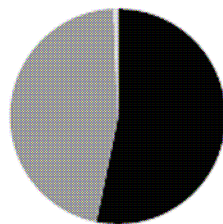

SP, 36%

■ ACT   ■ Non-artemisinin monotherapy   ■ Artemisinin monotherapy
